# Supplementary material for: CO2 chemisorption in Li2CuO2 microstructurally modified by ball milling: study performed with different physicochemical CO2 capture conditions
Source: Royal Society of Chemistry journal article supplement (doi:10.1039/c6ra06895b), 2016-01-01
Supplement: c6ra06895b1.pdf [file c6ra06895b1.pdf]

## CO<sub>2</sub> chemisorption in Li<sub>2</sub>CuO<sub>2</sub> microstructurally modified by ball milling process:

### Study performed with different physicochemical CO<sub>2</sub> capture conditions

Hugo A. Lara-García, Margarita J. Ramírez-Moreno, José Ortiz-Landeros

and Heriberto Pfeiffer

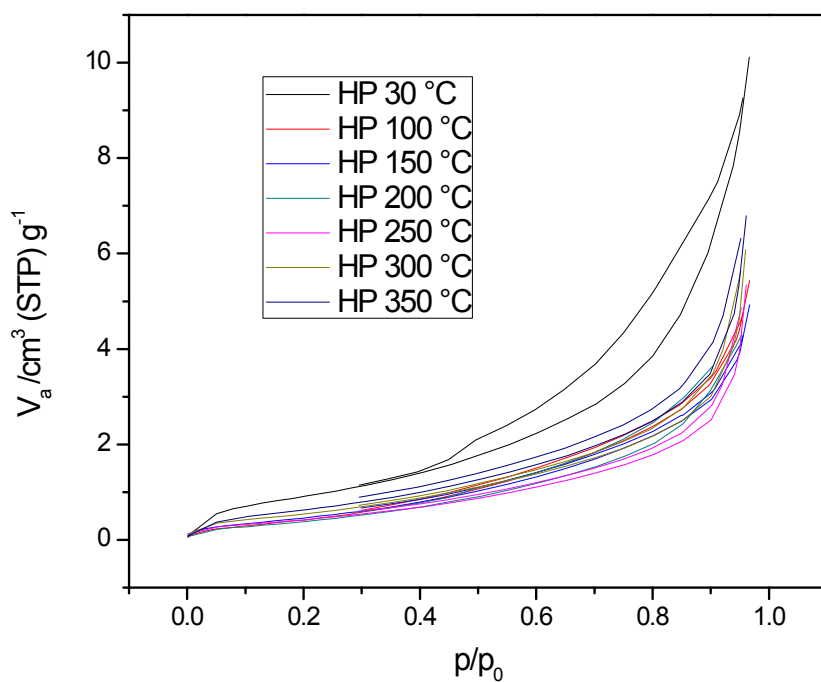

N<sub>2</sub> adsorption–desorption isotherms of Li<sub>2</sub>CuO<sub>2</sub> dry ball milled sample after the high pressure CO<sub>2</sub> sorption process performed at different temperatures.
